# Supplementary material
Source: PubMed Central journal article supplement (PMC140874)

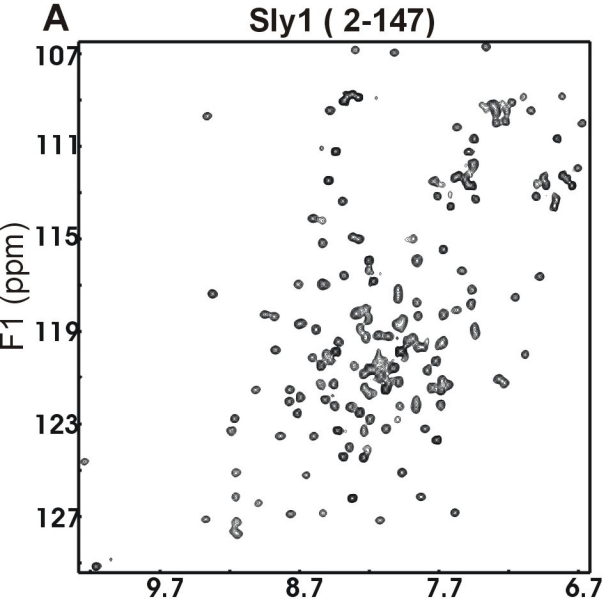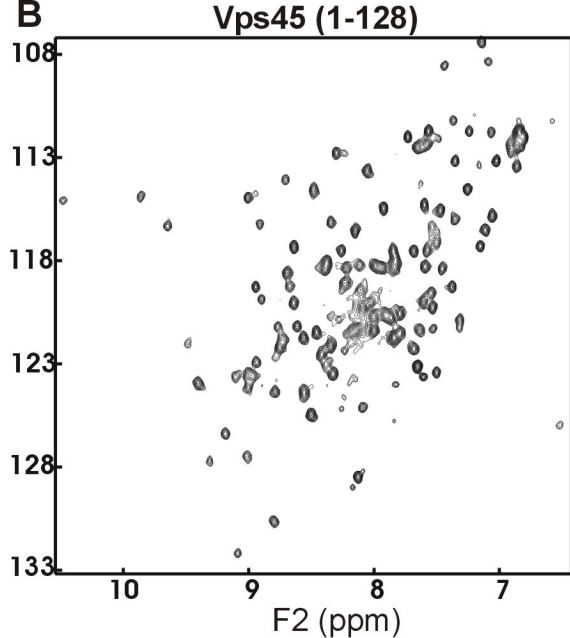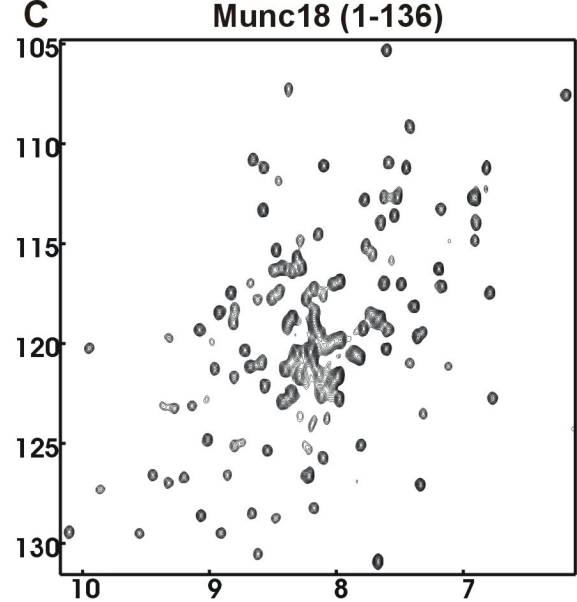

Supplement: pnas_232701299_3.pdf [file pnas_232701299_3.pdf]
